# Supplementary material for: Epitaxial growth of highly symmetrical branched noble metal-semiconductor heterostructures with efficient plasmon-induced hot-electron transfer
Source: PubMed Central journal article supplement (PMC10156852; doi:10.1038/s41467-023-38237-7), 2023-05-03
Supplement: 41467_2023_38237_MOESM3_ESM.pdf [file 41467_2023_38237_MOESM3_ESM.pdf]

### **Description of Additional Supplementary Files**

File Name: Supplementary Data 1

Description: Interface Structure: The 3D model of the epitaxial Ag-CdS interface.

File Name: Supplementary Movie 1

Description: Interface Structure: The 3D model of the epitaxial Ag-CdS interface.
